# Supplementary material
Source: Royal Society of Chemistry journal article supplement (doi:10.1039/d5nr05445a)
Supplement: d5nr05445a1.pdf [file d5nr05445a1.pdf]

Supplementary Information for

**Enhancing the Quantum Yield of Lanthanide Clusters via Single-Site Ligand Modulation**

Tingting Li,<sup>a</sup> Yaoqin Wu,<sup>a</sup> Feng Jiang,<sup>b\*</sup> HaiFeng Zhu,<sup>b\*</sup> Shengrong He,<sup>b</sup> Jiyu Sui,<sup>a</sup> Cong Zhang,<sup>a</sup>  
Zhennan Wu<sup>b\*</sup> and Xue Bai<sup>b\*</sup>

<sup>a</sup>College of Materials Science and Engineering, Jilin Jianzhu University, Changchun, 130012, China.

<sup>b</sup> State Key Laboratory of Integrated Optoelectronics and College of Electronic Science and Engineering, Jilin University, Changchun 130012, China.

Correspondence: [jiangfeng21@mails.jlu.edu.cn](mailto:jiangfeng21@mails.jlu.edu.cn) (F. Jiang); [zhuhf23@mails.jlu.edu.cn](mailto:zhuhf23@mails.jlu.edu.cn) (H. Zhu),  
[wuzn@jlu.edu.cn](mailto:wuzn@jlu.edu.cn) (Z. Wu); [baix@jlu.edu.cn](mailto:baix@jlu.edu.cn) (X. Bai)

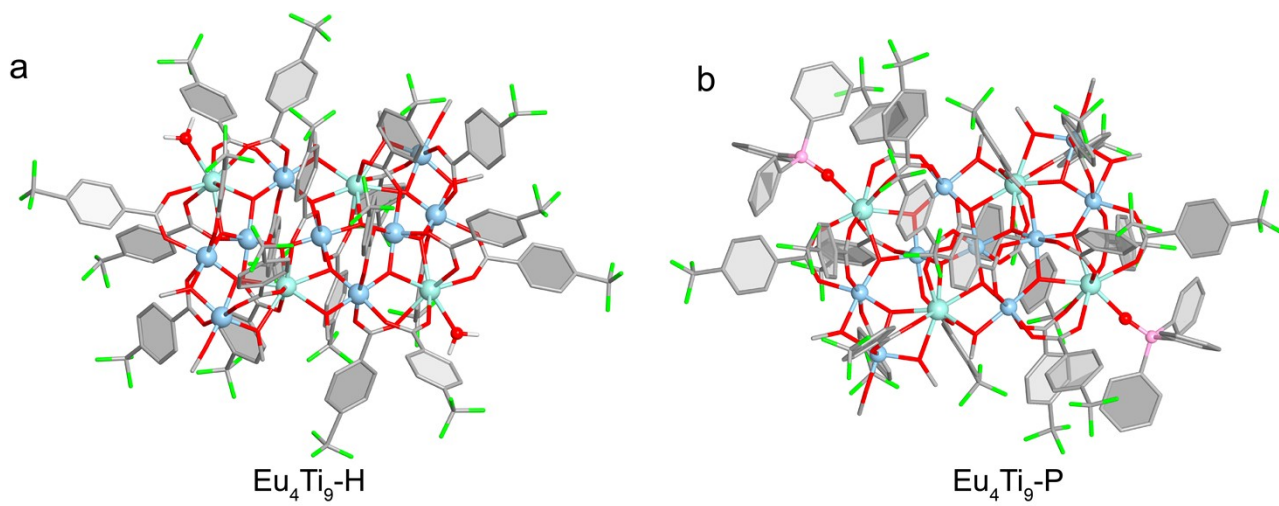

**Fig. S1.** (a) The structure of  $\text{Eu}_4\text{Ti}_9\text{-H}$ ; (b) The structure of  $\text{Eu}_4\text{Ti}_9\text{-P}$ .

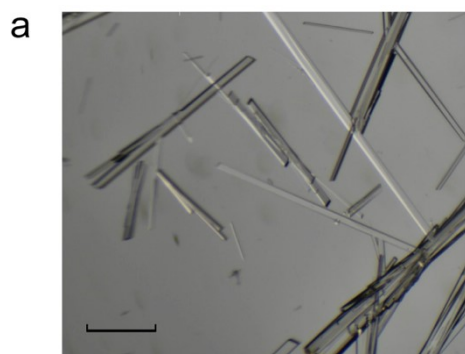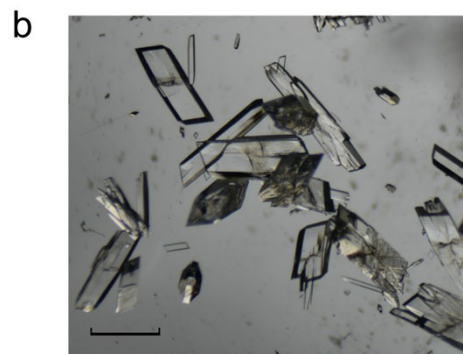

**Fig. S2.** Photographs of the **Eu<sub>4</sub>Ti<sub>9</sub>-H** (a) and **Eu<sub>4</sub>Ti<sub>9</sub>-P** (b). Typical optical image of as-grown large-scale clusters achieved. The size of the crystal can be well controlled by the growth time. Scale bar: 50  $\mu\text{m}$

a

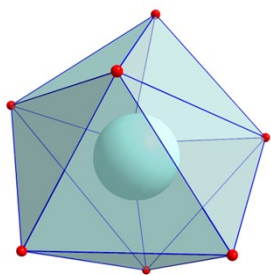

b

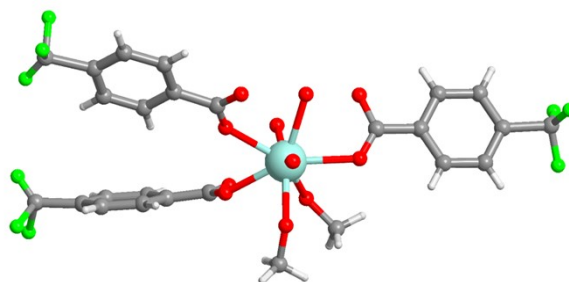

**Fig. S3.** The coordination geometry (a) and coordination environment (b) of Eu1 ion for the **Eu<sub>4</sub>Ti<sub>9</sub>-H**.

a

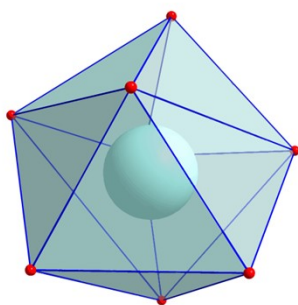

b

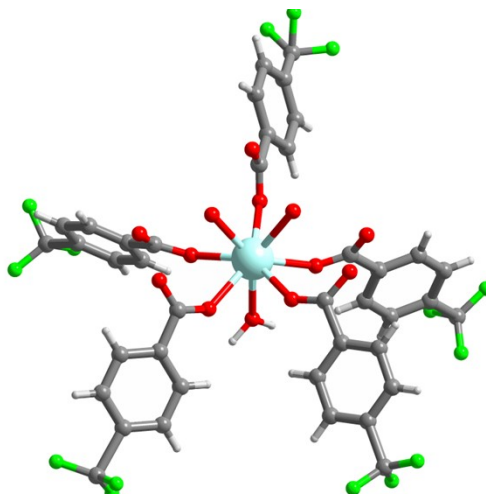

**Fig. S4.** The coordination geometry (a) and coordination environment (b) of Eu<sup>2+</sup> for the **Eu<sub>4</sub>Ti<sub>9</sub>-H**.

a

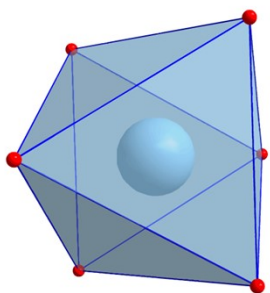

b

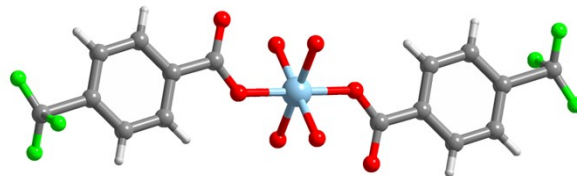

**Fig. S5.** The coordination geometry and coordination environment of Ti1 for the **Eu<sub>4</sub>Ti<sub>9</sub>-H**.

a

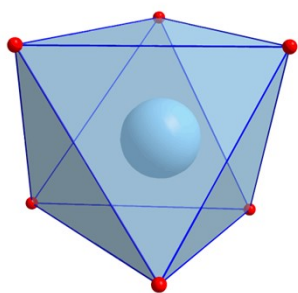

b

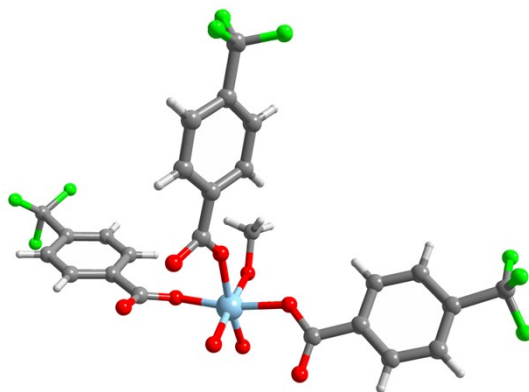

**Fig. S6.** The coordination geometry and coordination environment of Ti<sub>2</sub> for the **Eu<sub>4</sub>Ti<sub>9</sub>-H**.

a

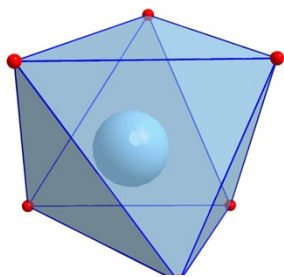

b

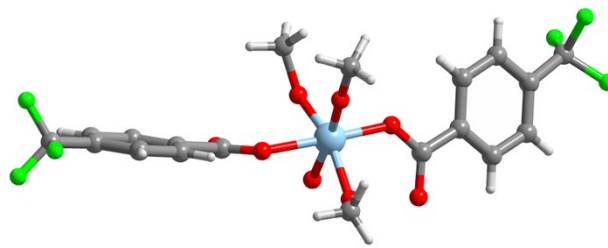

**Fig. S7.** The coordination geometry and coordination environment of Ti<sup>3+</sup> for the **Eu<sub>4</sub>Ti<sub>9</sub>-H**.

a

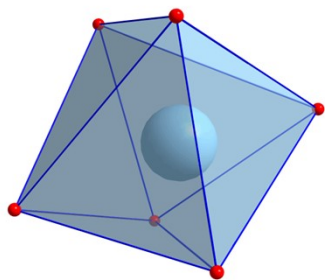

b

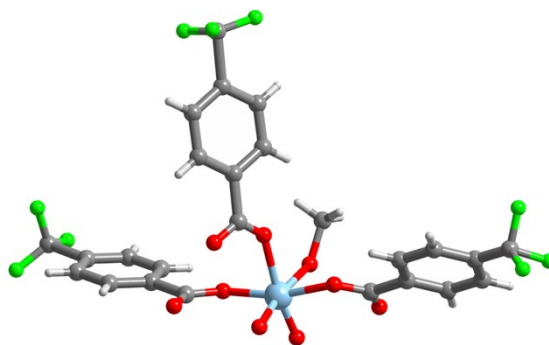

**Fig. S8.** The coordination geometry and coordination environment of Ti<sup>4+</sup> for the **Eu<sub>4</sub>Ti<sub>9</sub>-H**.

a

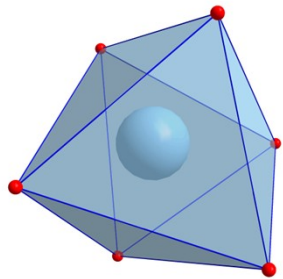

b

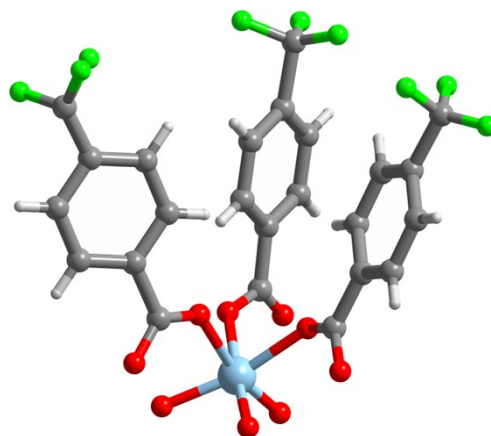

**Fig. S9.** The coordination geometry and coordination environment of Ti5 for the **Eu<sub>4</sub>Ti<sub>9</sub>-H**

a

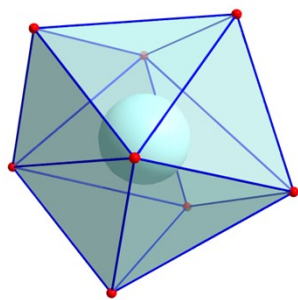

b

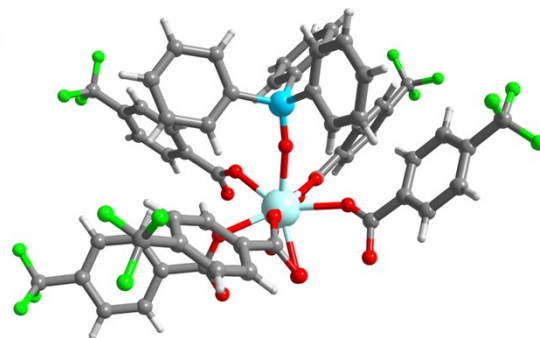

**Fig. S10.** The coordination geometry (a) and coordination environment (b) of Eu<sup>2+</sup> for the **Eu<sub>4</sub>Ti<sub>9</sub>-P**.

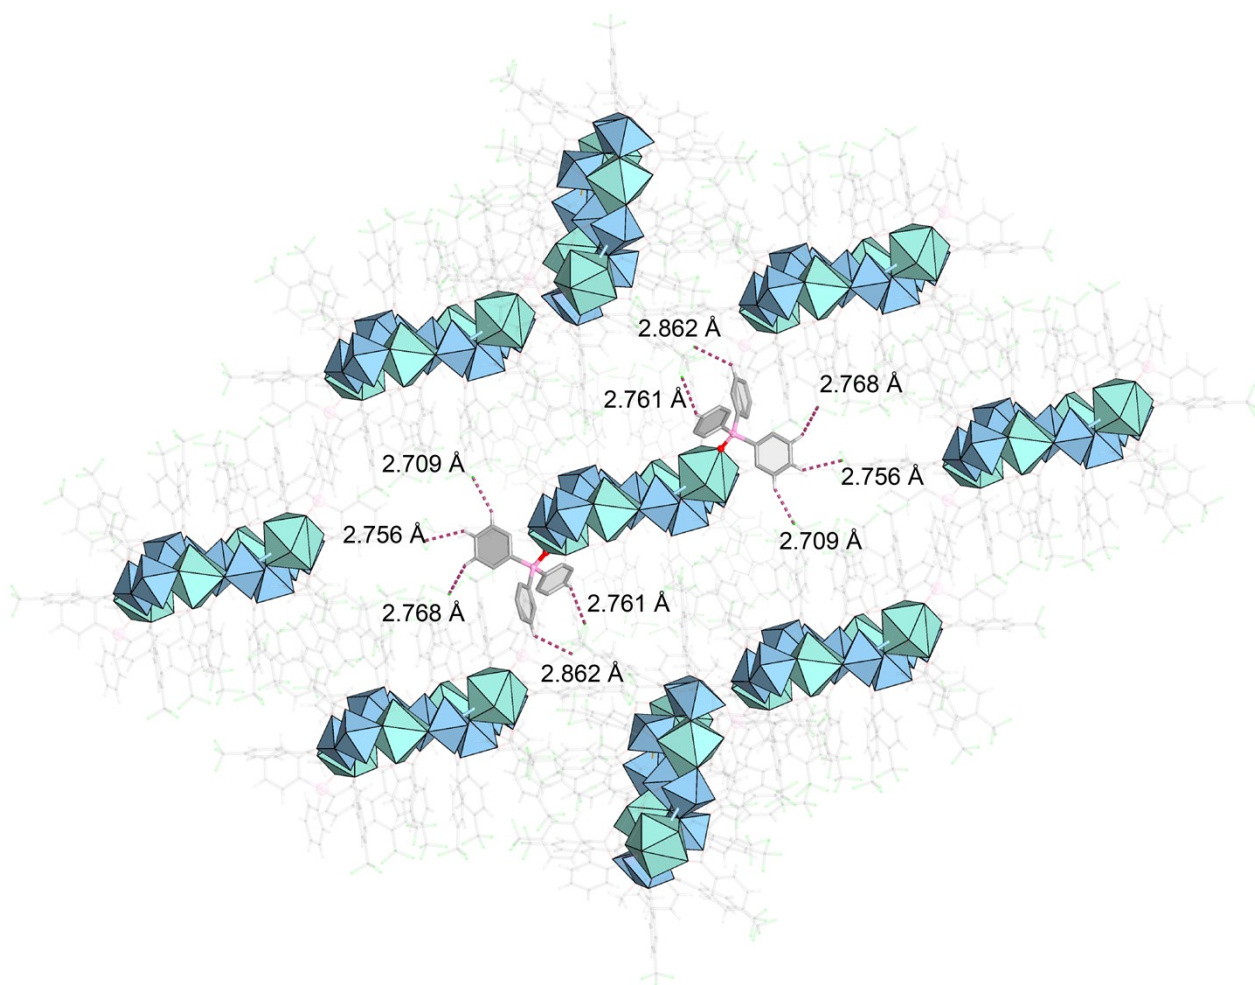

**Fig. S11.** Schematic representation of the C–H···F interactions between adjacent  $\text{Eu}_4\text{Ti}_9\text{-P}$  clusters.

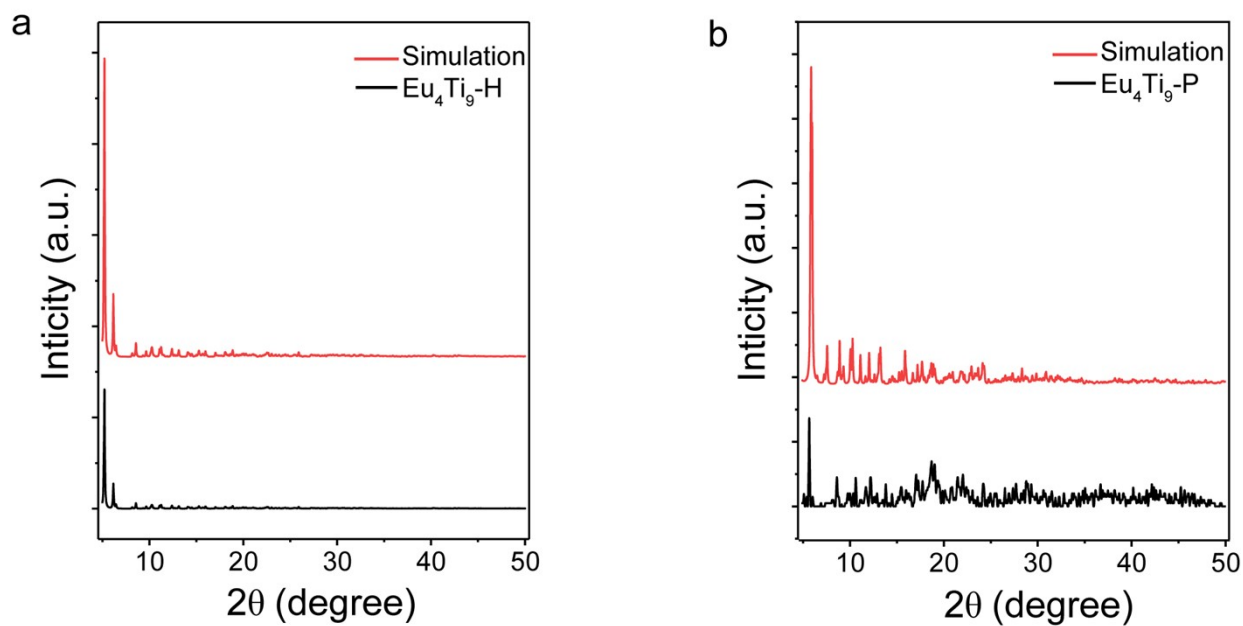

**Fig. S12.** The XRD of the  $\text{Eu}_4\text{Ti}_9\text{-H}$  (a) and  $\text{Eu}_4\text{Ti}_9\text{-P}$  (b). The diffraction peaks of all the cluster crystal powder samples are in good agreement with the simulated diffraction patterns, indicating that the crystal structures of these clusters do not change significantly and have a high degree of similarity.

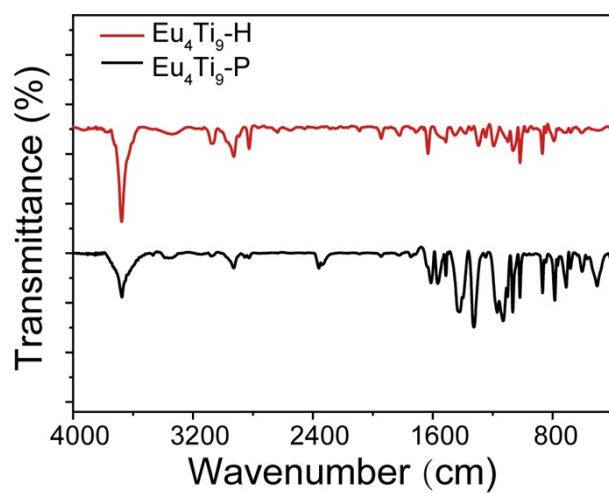

**Fig. S13.** IR spectra of the  $\text{Eu}_4\text{Ti}_9\text{-H}$  and  $\text{Eu}_4\text{Ti}_9\text{-P}$ . The strong absorption bands from  $1630\text{ cm}^{-1}$  to  $1060\text{ cm}^{-1}$  were caused by the C=O and C-O stretching vibration of 4-TFMBA;

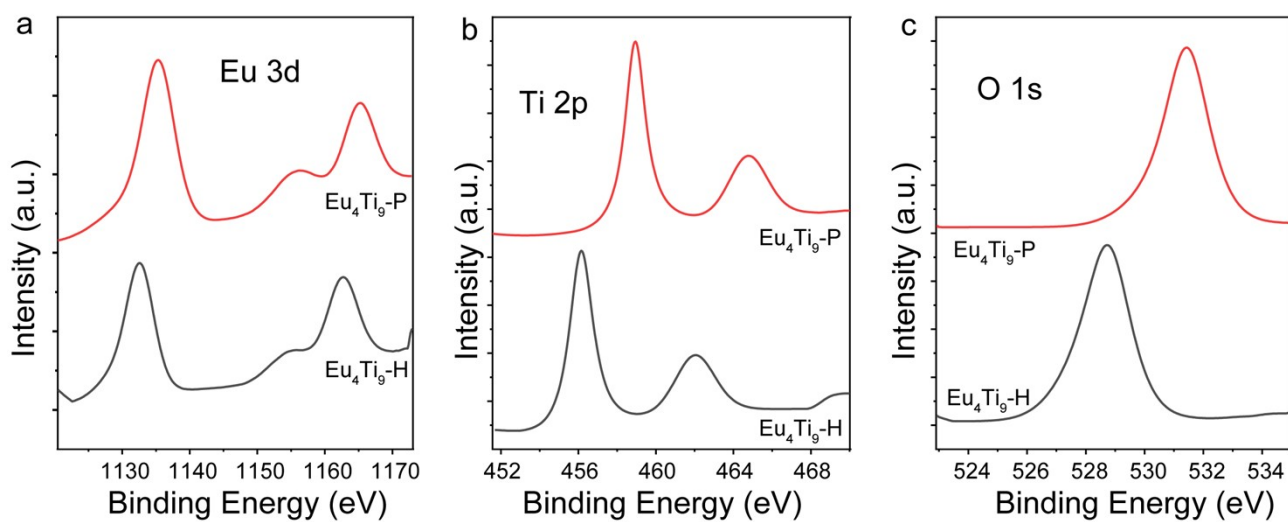

**Fig. S14.** The XPS of the **Eu<sub>4</sub>Ti<sub>9</sub>-H** and **Eu<sub>4</sub>Ti<sub>9</sub>-P**. The binding energy peaks in the range of 1130-1170 eV correspond to Eu 3d (a), 452-468 eV correspond to Ti 2p (b), and 524-534 eV correspond to O 1s (c), respectively.

**Table S1.** Crystallographic data for the **Eu<sub>4</sub>Ti<sub>9</sub>-H** and **Eu<sub>4</sub>Ti<sub>9</sub>-P**.

| Complex                                     | Eu <sub>4</sub> Ti <sub>9</sub> -H                                                                | Eu <sub>4</sub> Ti <sub>9</sub> -P                                                                                              |
|---------------------------------------------|---------------------------------------------------------------------------------------------------|---------------------------------------------------------------------------------------------------------------------------------|
| formula                                     | C <sub>177</sub> H <sub>144</sub> Eu <sub>4</sub> F <sub>60</sub> O <sub>69</sub> Ti <sub>9</sub> | C <sub>214</sub> H <sub>154</sub> Eu <sub>4</sub> F <sub>60</sub> N <sub>4</sub> O <sub>62</sub> P <sub>2</sub> Ti <sub>9</sub> |
| Formula weight                              | 5553.85                                                                                           | 6014.28                                                                                                                         |
| Crystal system                              | monoclinic                                                                                        | monoclinic                                                                                                                      |
| Space group                                 | <i>C2/c</i>                                                                                       | <i>P2<sub>1</sub>/n</i>                                                                                                         |
| a/Å                                         | 29.4514(10)                                                                                       | 19.3775(18)                                                                                                                     |
| b/Å                                         | 22.7927(7)                                                                                        | 21.280(2)                                                                                                                       |
| c/Å                                         | 36.9556(10)                                                                                       | 28.197(2)                                                                                                                       |
| α/°                                         | 90                                                                                                | 90                                                                                                                              |
| β/°                                         | 111.077(3)                                                                                        | 90.647(3)                                                                                                                       |
| γ/°                                         | 90                                                                                                | 90                                                                                                                              |
| Volume/Å <sup>3</sup>                       | 23147.7(13)                                                                                       | 11626.3(18)                                                                                                                     |
| Z                                           | 4                                                                                                 | 2                                                                                                                               |
| ρ <sub>calc</sub> /cm <sup>3</sup>          | 1.594                                                                                             | 1.718                                                                                                                           |
| μ/mm <sup>-1</sup>                          | 11.232                                                                                            | 1.495                                                                                                                           |
| F(000)                                      | 10992                                                                                             | 5964                                                                                                                            |
| Crystal size/mm <sup>3</sup>                | 0.2 × 0.1 × 0.1                                                                                   | 0.13 × 0.12 × 0.1                                                                                                               |
| Radiation                                   | Cu Kα (λ = 1.54184)                                                                               | MoKα (λ = 0.71073)                                                                                                              |
| 2θ range for data collection/°              | 5.038 to 152.232                                                                                  | 5.074 to 55.036                                                                                                                 |
| Index ranges                                | -36 ≤ h ≤ 34, -28 ≤ k ≤ 28, -46 ≤ l ≤ 44                                                          | -25 ≤ h ≤ 25, -27 ≤ k ≤ 27, -36 ≤ l ≤ 35                                                                                        |
| Reflections collected                       | 108528                                                                                            | 473631                                                                                                                          |
| Independent reflections                     | 22470 [R <sub>int</sub> = 0.1094, R <sub>sigma</sub> = 0.1219]                                    | 26726 [R <sub>int</sub> = 0.0577, R <sub>sigma</sub> = 0.0190]                                                                  |
| Data/restraints/parameters                  | 22470/883/1571                                                                                    | 26726/760/1840                                                                                                                  |
| Goodness-of-fit on F <sup>2</sup>           | 1.063                                                                                             | 1.122                                                                                                                           |
| Final R indexes [I ≥ 2σ (I)]                | R <sub>1</sub> = 0.0918, wR <sub>2</sub> = 0.2536                                                 | R <sub>1</sub> = 0.0329, wR <sub>2</sub> = 0.0769                                                                               |
| Largest diff. peak/hole / e Å <sup>-3</sup> | 0.79/-1.39                                                                                        | 0.80/-0.89                                                                                                                      |

**Table S2.** Best-fitting parameters for the thermometric parameter ( $\Delta$ )

|                | Eu <sub>4</sub> Ti <sub>9</sub> -H | Eu <sub>4</sub> Ti <sub>9</sub> -P |
|----------------|------------------------------------|------------------------------------|
| A <sub>1</sub> | 1.900                              | 2.231                              |
| A <sub>2</sub> | 1.490                              | 0.984                              |
| X <sub>0</sub> | 67.180                             | 139.465                            |
| R <sup>2</sup> | 0.843                              | 0.991                              |
